# Supplementary material
Source: publisher figshare collection journal article supplement (https://rs.figshare.com/ndownloader/files/35933431)
Supplement: Supplementary file 1 [file 35933431]

clear % wave superposition from Lorentzian cone 
load('parameters.mat', 'hsi','Rs','Depth','wl', 'n','Asp', 'savef');
 % W3=WHr/3; W2=WHr/2; W1=WHr/1; widt'Depth=[ W1 W2 W3];%set range to 3 times width
funz = @(rs,W,x0) (1-W.^2./(rs.^2+W.^2))./(1-W.^2./(x0^2+W.^2)); % make height as unity
funR = @(rs, phs, Xscr,L,W,x0) sqrt((1-funz(rs,W,x0)+L).^2+(rs.*cos(phs)-Xscr).^2+(rs.*sin(phs)).^2);
funth = @(rs, phs, Xscr,L,W,x0) atan(sqrt((rs.*cos(phs)-Xscr).^2+(rs.*sin(phs)).^2)./(1-funz(rs,W,x0)+L));
% funy = @(x) 1-exp(-0.5*x.^2/W^2); % make height as unityfunphase = @(x,xc,yc,phase) cos((2*pi/wl).*funy(x)+(2*pi/wl).*n.*sqrt((funy(x)-yc).^2+(x-xc).^2)+phase).*cos(0.5*atan((x-xc)./(funy(x)-yc)))./sqrt((funy(x)-yc).^2+(x-xc).^2); % point source 1D integration 
funphase =  @(rs,phs,Xscr,L,wl,W,x0,phase) rs.*(cos((2*pi./wl).*funz(rs,W,x0)+(2*pi./wl).*n.*funR(rs, phs, Xscr, L,W,x0)+phase)+1i*sin((2*pi./wl).*funz(rs,W,x0)+(2*pi./wl).*n.*funR(rs, phs, Xscr, L,W,x0)+phase)).*cos(0.5*funth(rs, phs, Xscr, L,W,x0))./funR(rs, phs, Xscr, L,W,x0);  % point source 1D integration 
positionx=zeros(1,101);positiony=zeros(1,101);Int=zeros(1,101);Int1=zeros(1,101);Int2=zeros(1,101);%Int3=zeros(1,101);Int4=zeros(1,101);
hold on
% savefile = ['data/gaussian/', savef, '.dat'];
    xmax=0.5/Asp;width=xmax/2;wln=num2str(wl*1000);wl=wl/hsi;
    savefile = ['data12/Lorxzwl',wln, savef , '.dat'];
    for m=1:101
    radius=(m-51)*xmax/50;positionx(m)=radius*hsi;
    positiony(m)=(1-funz(radius,width,xmax))*hsi;
    end
figure(1); plot(positionx,positiony);
for j=1:101
    L=(j-1)*Depth/100+0.1;
    for i=1:101
        Xs=(i-51)*Rs/50;
        phase=0;%-(2*pi/wl)*n*(1+L);xmax2=2*xmax/3;xmax1=xmax/3;
       % amp1=integral2 (@(rs, phs) funphase(rs,phs,Xs, L,wl,W1,phase),0,xmax,-pi,pi,'RelTol',1e-6,'AbsTol',1e-6); %*cos(theda); % integration
       % amp2=integral2 (@(rs, phs) funphase(rs,phs,Xs, L,wl,W2,phase),0,xmax,-pi,pi,'RelTol',1e-6,'AbsTol',1e-6); %*cos(theda); % integration
       % amp3=integral2 (@(rs, phs) funphase(rs,phs,Xs, L,wl,W3,phase),0,xmax,-pi,pi,'RelTol',1e-6,'AbsTol',1e-6); %*cos(theda); % integration
        amp=integral2 (@(rs, phs) funphase(rs,phs,Xs, L,wl,width,xmax,phase),0,xmax,-pi,pi,'method','iterated','RelTol',1e-6,'AbsTol',0); %*cos(theda); % integration
        Int(i)=abs(amp)^2;%Int1(i)=real(amp);Int2(i)=imag(amp); % Int2(i)=abs(amp2)^2;Int3(i)=abs(amp3)^2;
        positiony(i)=(1+L)*hsi;positionx(i)=Xs*hsi;
    end
    data=[positionx', positiony',Int'];
    if j==1
       save(savefile, 'data','-ascii','-tabs');
   else
       save(savefile, 'data','-ascii','-tabs', '-append');
   end
end
% hold on
% figure(1);plot(position,Amp); 
%plot(position,Int);
%data=[wavelength', index'];
%savefile = [ savefile , '.dat'];
%save(savefile, 'data','-ascii','-tabs');
